# Supplementary material for: Recalibrating the epigenetic clock: implications for assessing biological age in the human cortex
Source: PubMed Central journal article supplement (PMC7805794; doi:10.1093/brain/awaa334), 2020-10-29
Supplement: awaa334_supplementary_data.pdf [file awaa334_supplementary_data.pdf]

# Supplementary data

## **Recalibrating the Epigenetic Clock: Implications for Assessing Biological Age in the Human Cortex**

Gemma L Shireby<sup>1</sup>, Jonathan P Davies<sup>1</sup>, Paul T Francis<sup>1,2</sup>, Joe Burrage<sup>1</sup>, Emma M Walker<sup>1</sup>, Grant W A Neilson<sup>1</sup>, Aisha Dahir<sup>1</sup>, Alan J Thomas<sup>3</sup>, Seth Love<sup>4</sup>, Rebecca G Smith<sup>1</sup>, Katie Lunnon<sup>1</sup>, Meena Kumari<sup>5</sup>, Leonard C Schalkwyk<sup>5</sup>, Kevin Morgan<sup>6</sup>, Keeley Brookes<sup>7</sup>, Eilis J Hannon<sup>1\*</sup>, Jonathan Mill<sup>1\*</sup>

<sup>1</sup>University of Exeter Medical School, University of Exeter, Exeter, UK

<sup>2</sup>Wolfson Centre for Age-Related Diseases, King's College London, London, UK

<sup>3</sup>Institute of Neuroscience, Newcastle University, Newcastle Upon Tyne, UK

<sup>4</sup>Dementia Research Group, Institute of Clinical Neurosciences, School of Clinical Sciences, University of Bristol, Bristol, UK

<sup>5</sup>School of Biological Sciences, University of Essex, Colchester, UK

<sup>6</sup>Human Genetics Group, University of Nottingham, Nottingham, UK

<sup>7</sup>School of Science & Technology, Nottingham Trent University, Nottingham, UK

\* These authors contributed equally.

**Figure S1: Histograms showing the distribution of chronological age in the datasets used in the study. (A) The training dataset (n = 1,047 cortical samples); (B) the testing dataset (n = 350 cortical samples); (C) the independent test dataset (n = 1221 cortical samples) and (D) the whole blood dataset (n = 1175 whole blood samples).**

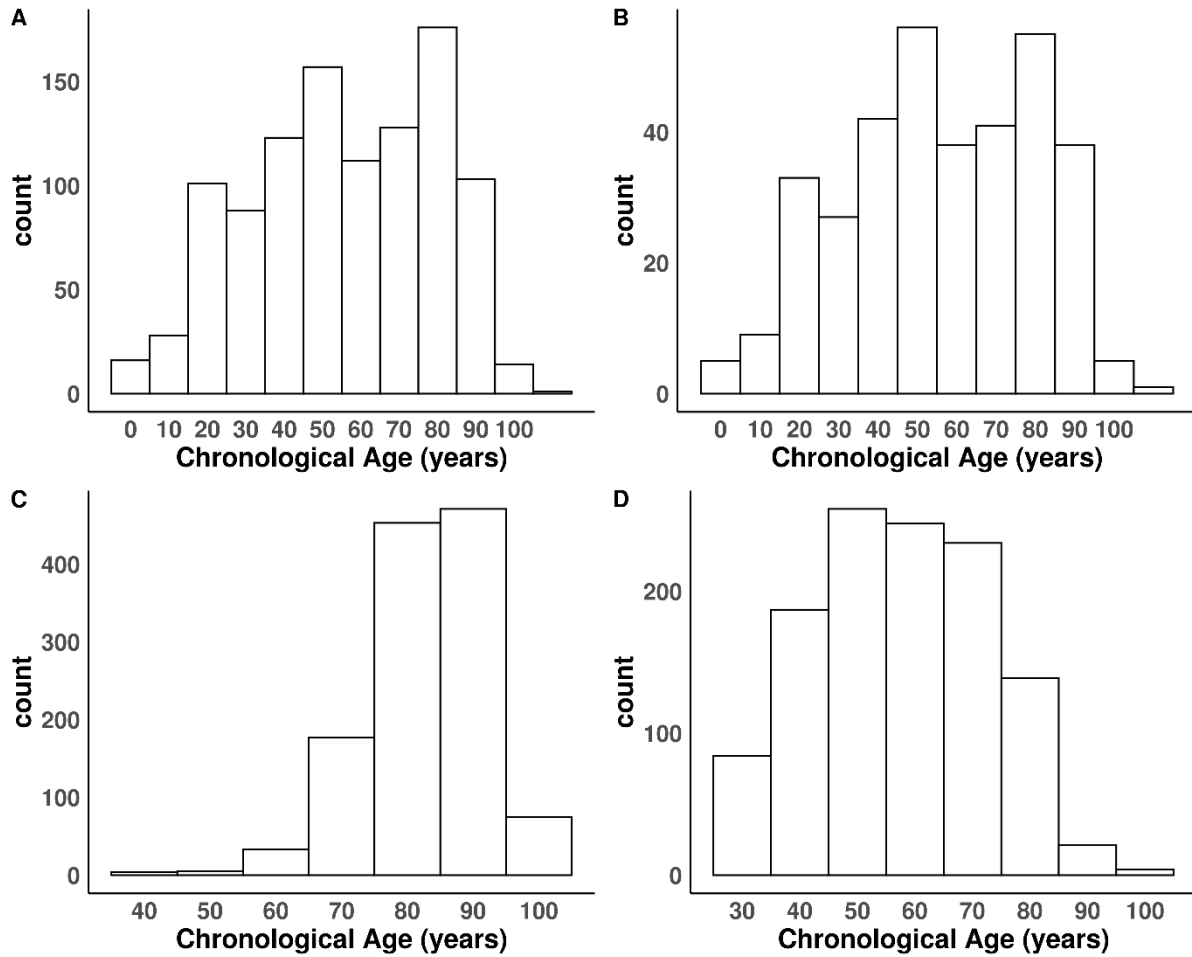

**Figure S2: DNA methylation age has a logarithmic relationship with chronological age between the ages of 0-20 years.** From 20 years onward there is a linear relationship with chronological age. The x-axis represents chronological age (years), the y-axis represents predicted age prior to applying the anti-transformation function, whereby age between 0-20 years is log transformed, and ages 20+ are transformed to account for this. Each point on the plot is a sample from the testing dataset (n = 350 cortical samples).

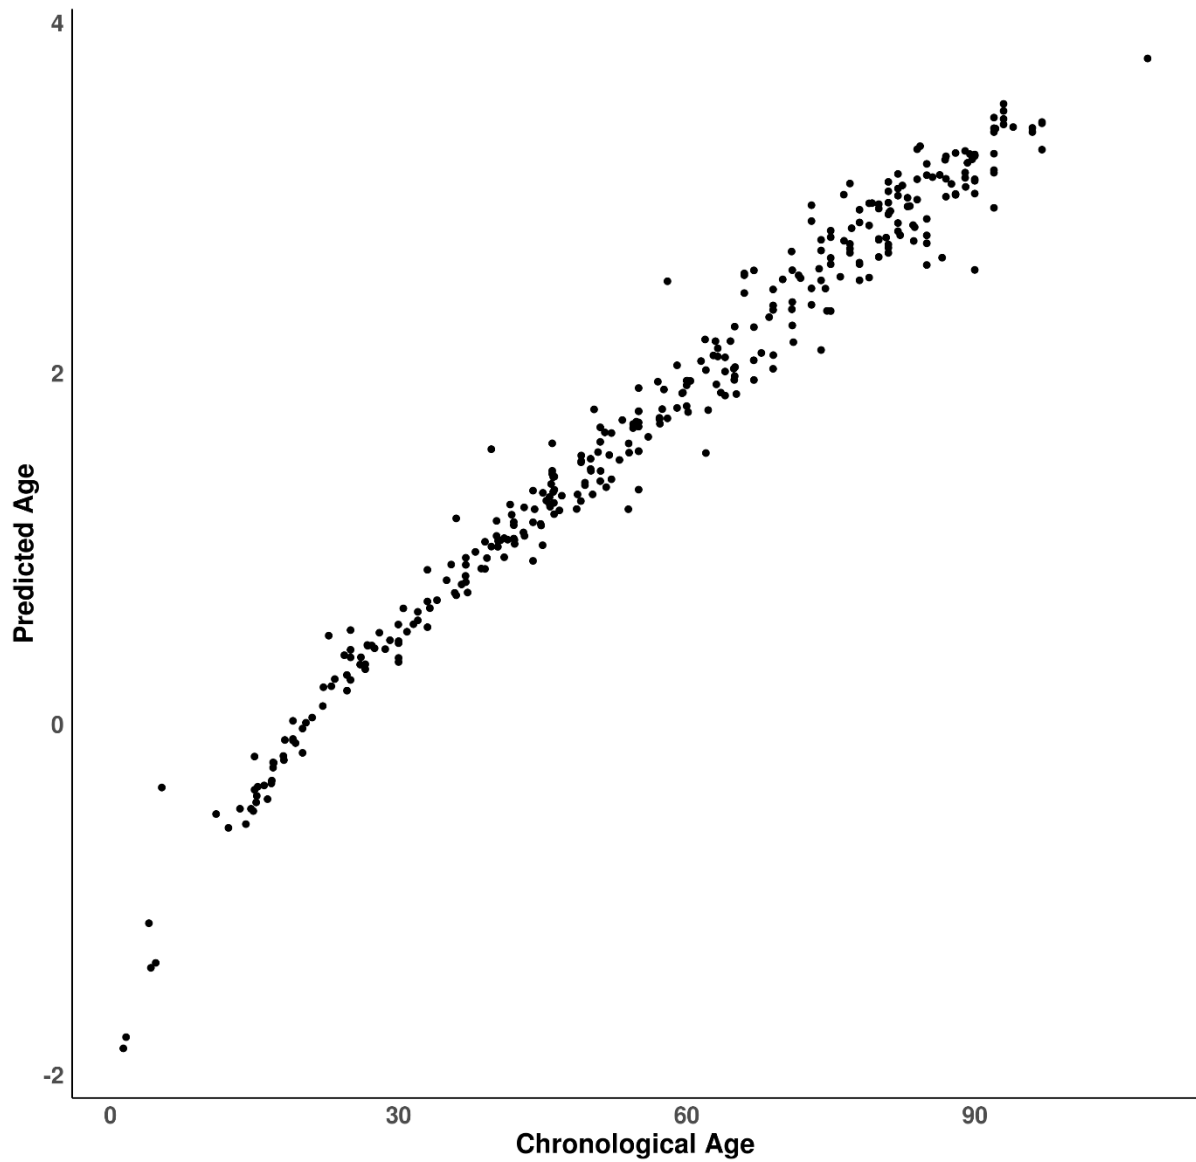

**Figure S3: The cortical DNAm age clock has elevated accuracy in human cortex samples compared to existing DNAm clocks.** Shown is the distribution of the error (DNA methylation age - chronological age) for each of the four DNA methylation age clocks in (A) the testing dataset (n = 350 cortical samples) and (B) the independent test dataset (n = 1,221 cortical samples). The ends of the boxes are the upper and lower quartiles of the errors, the horizontal line inside the box represents the median deviation and the two lines outside the boxes extend to the highest and lowest observations. Outliers are represented by points beyond these lines. The red horizontal line represents perfect prediction (zero error).

\*DNAmClock<sub>Cortical</sub> = Cortical DNA methylation age Clock; DNAmClock<sub>Multi</sub> = Multi-tissue DNA methylation age clock; DNAmClock<sub>Blood</sub> = Blood DNA methylation age clock and DNAmClock<sub>Pheno</sub> = Pheno Age DNA methylation age clock.

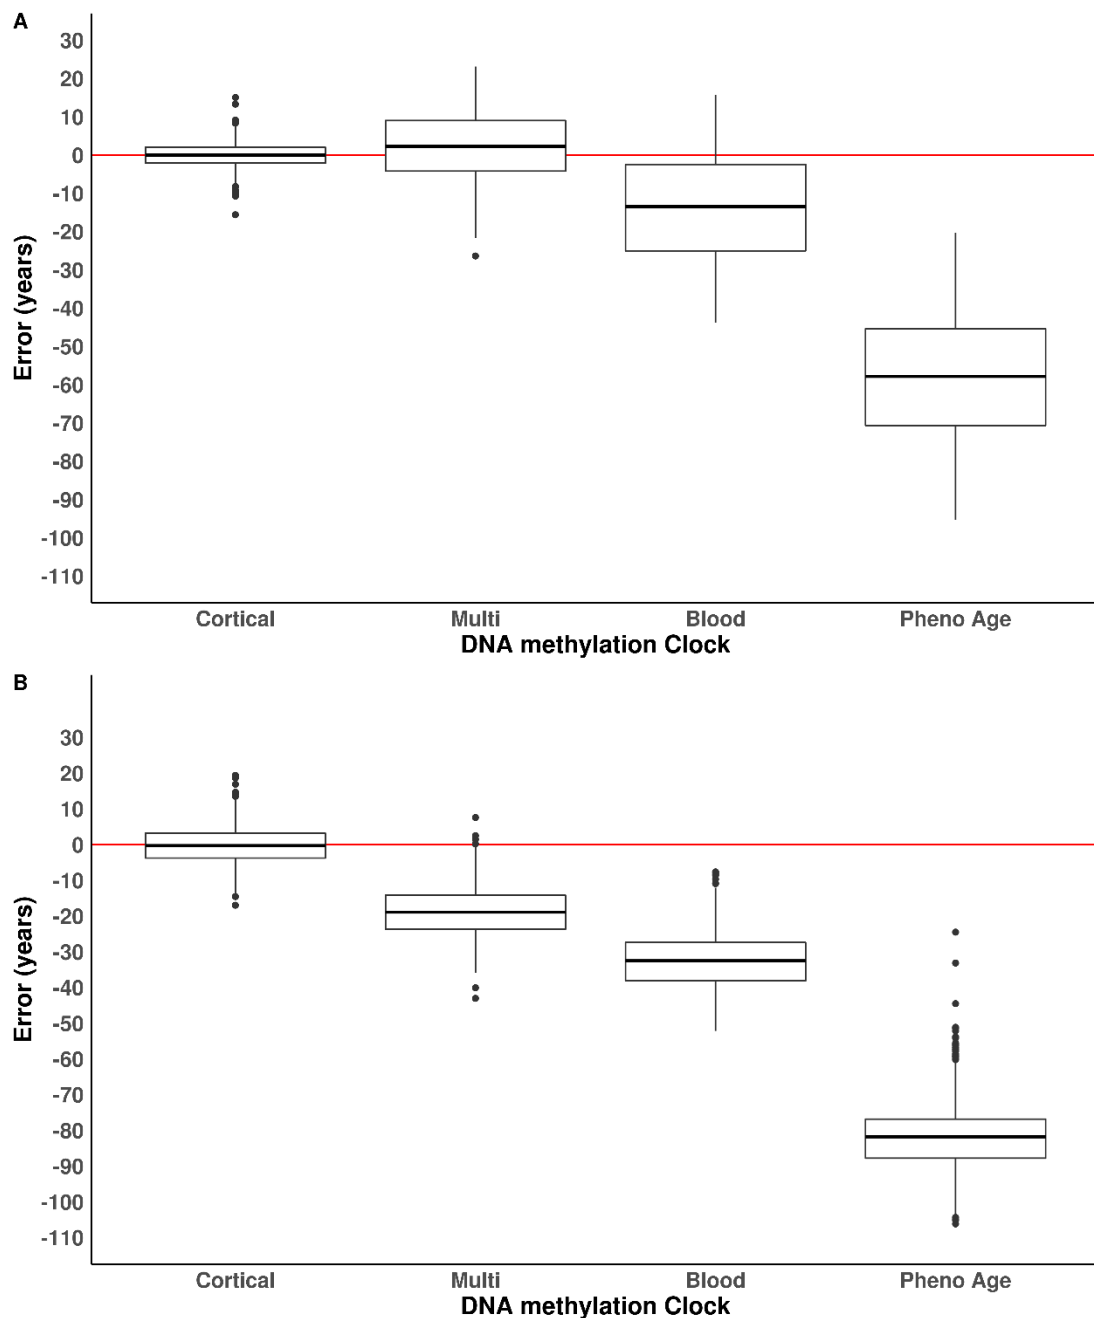

**Figure S4: Bland-Altman plots highlighting enhanced performance of the cortical DNAm clock in human cortex tissue across the lifespan.** Shown is the mean difference between actual chronological age and estimated DNAm ages derived in (A) the testing dataset (n= 350 cortical samples) and (B) the independent test dataset (n = 1221 cortical samples), where DNAm age derived using four DNA methylation age clocks: (i) our novel DNAmClock<sub>Cortical</sub>; (ii) Horvath's DNAmClock<sub>Multi</sub>; (iii) Zhang's DNAmClock<sub>Blood</sub> and (iv) Levine's DNAmClock<sub>Pheno</sub>. The dashed horizontal lines in each case are the differences between actual and chronological age +/- 1.96 \* standard deviation; for normally distributed difference due to error 5% points would lie outside these. The solid horizontal line represents where the difference would be zero.

\*DNAmClock<sub>Cortical</sub> = Cortical DNA methylation age Clock; DNAmClock<sub>Multi</sub> = Multi-tissue DNA methylation age clock; DNAmClock<sub>Blood</sub> = Blood DNA methylation age clock and DNAmClock<sub>Pheno</sub> = Pheno Age DNA methylation age clock.

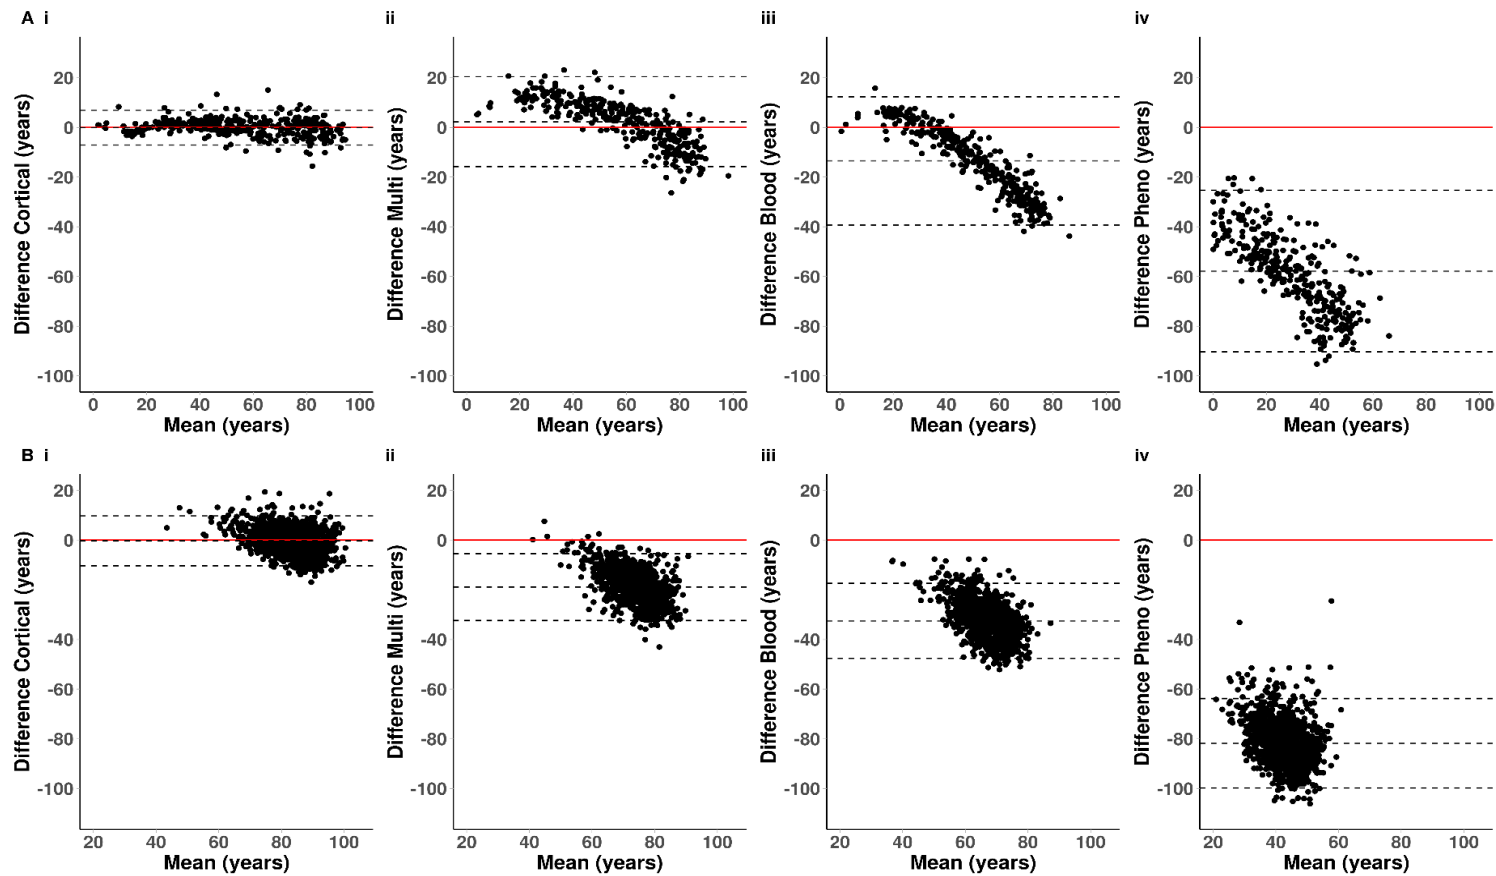

**Figure S5: The blood DNAm age clock has better accuracy in human whole blood samples compared to non-tissue specific DNAm clocks.** Distribution of the error in years (DNA methylation age - chronological age) comparing four DNA methylation age clocks: our novel DNAmClock<sub>Cortical</sub>, the DNAmClock<sub>Multi</sub>, the DNAmClock<sub>Blood</sub> and the DNAmClock<sub>Pheno</sub> in the **whole blood dataset** (n = 1175). The ends of the boxes are the upper and lower quartiles of the errors, the horizontal line inside the box represents the mean absolute deviation and the two lines outside the boxes extend to the highest and lowest observations. Outliers are represented by points beyond these lines.

\*DNAmClock<sub>Cortical</sub> = Cortical DNA methylation age Clock; DNAmClock<sub>Multi</sub> = Multi-tissue DNA methylation age clock; DNAmClock<sub>Blood</sub> = Blood DNA methylation age clock and DNAmClock<sub>Pheno</sub> = Pheno Age DNA methylation age clock.

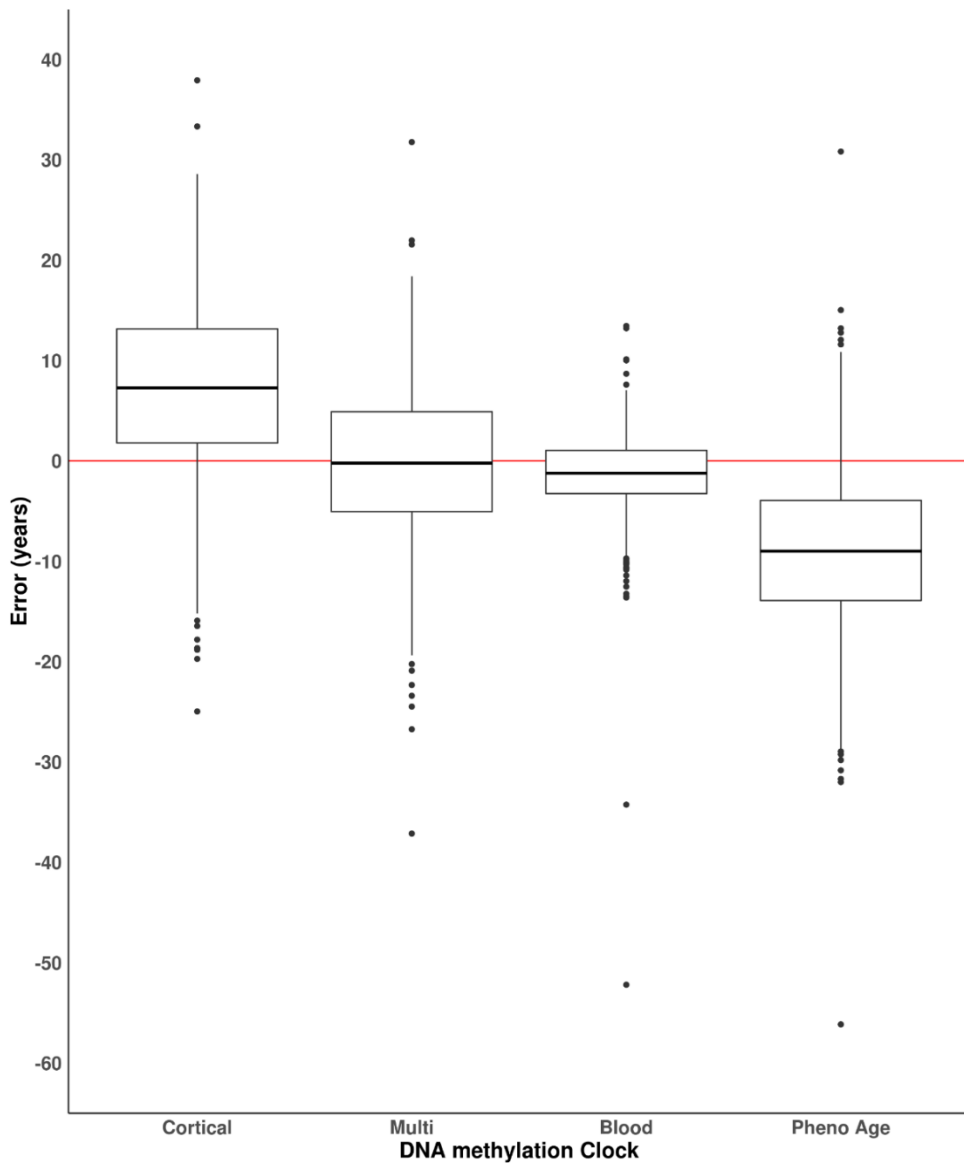

**Figure S6: Bland-Altman plots highlighting elevated performance of blood based DNAm clocks in whole blood samples.** Mean-difference (Bland-Altman) plots showing the difference between DNA methylation age estimates against chronological age using (A) our novel DNAmClock<sub>Cortical</sub>, (B) the DNAmClock<sub>Multi</sub>, (C) the DNAmClock<sub>Blood</sub> and (D) the DNAmClock<sub>Pheno</sub> in the whole blood cohort (n = 1175). The dashed horizontal lines in each case are the differences between actual and chronological age  $\pm 1.96$  \* standard deviation; for normally distributed difference due to error 5% points would lie outside these. The solid horizontal line represents where the difference would be zero.

\*DNAmClock<sub>Cortical</sub> = Cortical DNA methylation age Clock; DNAmClock<sub>Multi</sub> = Multi-tissue DNA methylation age clock; DNAmClock<sub>Blood</sub> = Blood DNA methylation age clock and DNAmClock<sub>Pheno</sub> = Pheno Age DNA methylation age clock.

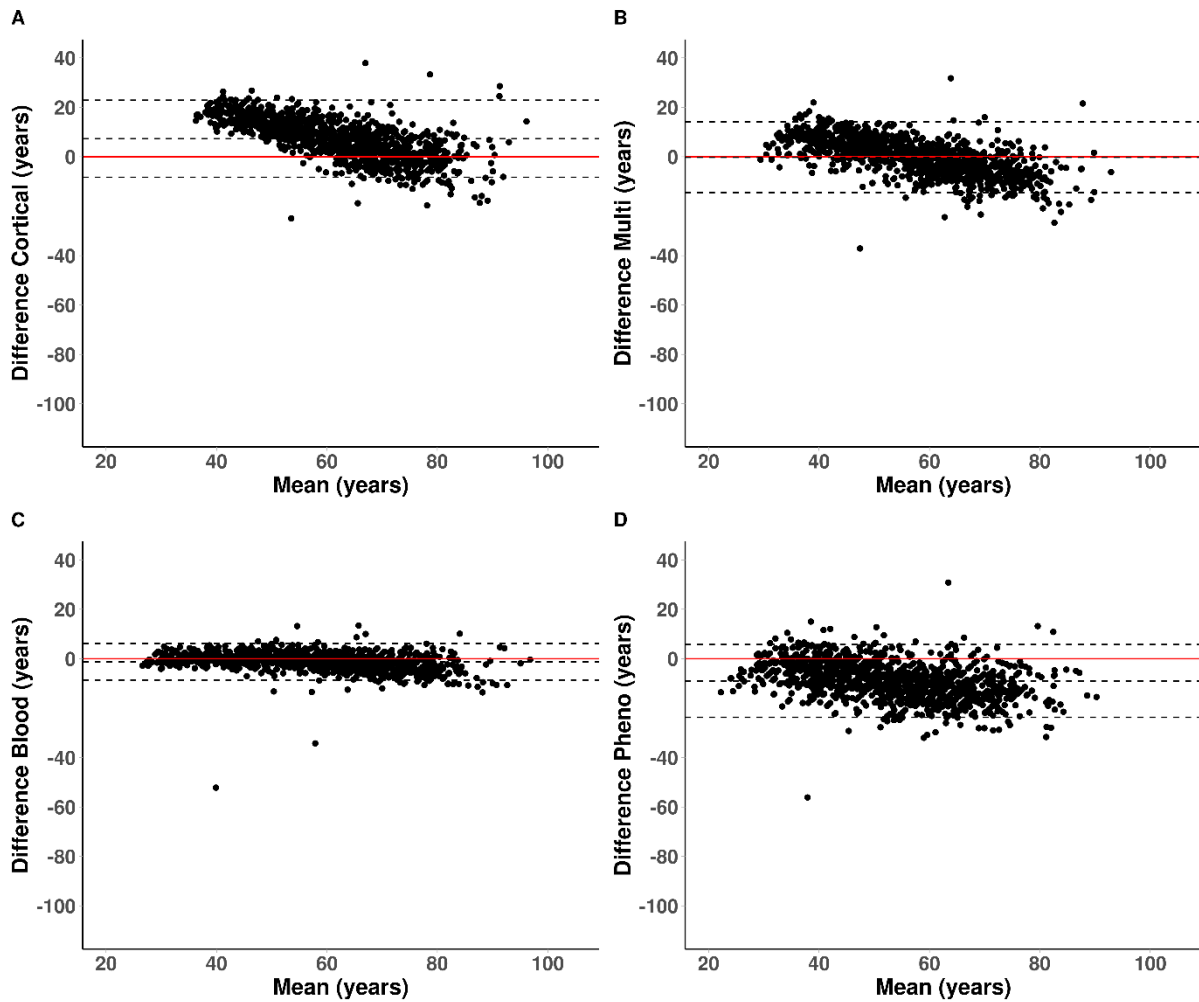

**Figure S7: The blood-based DNA methylation clock performs best in data derived from whole blood samples.** (A) Shown is a comparison of DNA methylation age estimates against chronological age in samples >55 years old from a large whole blood dataset (n = 646), where DNAm age is derived using four DNA methylation age clocks: (i) our novel DNAmClock<sub>Cortical</sub>; (ii) Horvath's DNAmClock<sub>Multi</sub>; (iii) Zhang's DNAmClock<sub>Blood</sub> and (iv) Levine's DNAmClock<sub>Pheno</sub>. The x-axis represents chronological age (years), the y-axis represents predicted age (years). Each point on the plot represents an individual in the whole blood dataset. Our novel clock does not predict as well as in the cortex, although it has a similar predictive ability to Horvath's clock. The distribution of the error (DNA methylation age - chronological age) is presented in (B) for each decile for each of the four DNA methylation clocks. Deciles were calculated by assigning chronological age into ten bins and are represented along the x-axis by the numbers one to ten, followed by brackets which display the age range included in each decile. The ends of the boxes are the upper and lower quartiles of the errors, the horizontal line inside the box represents the median deviation and the two lines outside the boxes extend to the highest and lowest observations. Outliers are represented by points beyond these lines. The red horizontal line represents perfect prediction (zero error).

\*DNAmClock<sub>Cortical</sub> = Cortical DNA methylation age Clock; DNAmClock<sub>Multi</sub> = Multi-tissue DNA methylation age clock; DNAmClock<sub>Blood</sub> = Blood DNA methylation age clock and DNAmClock<sub>Pheno</sub> = Pheno Age DNA methylation age clock.



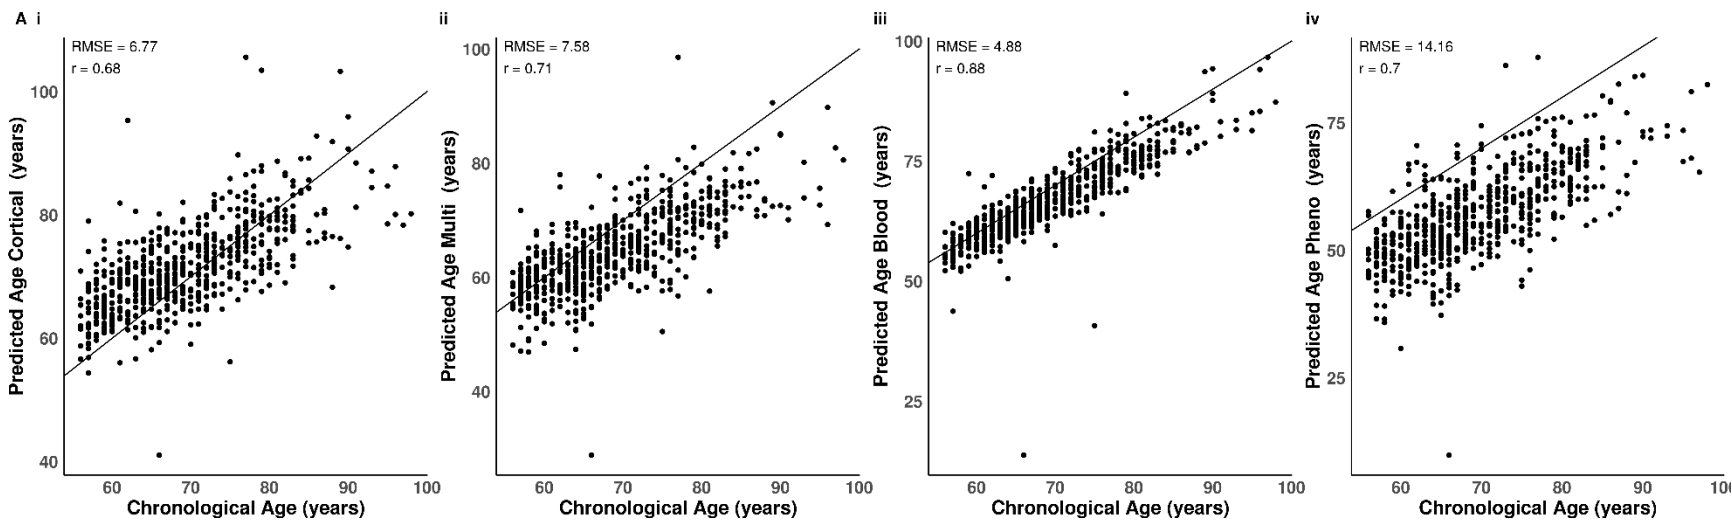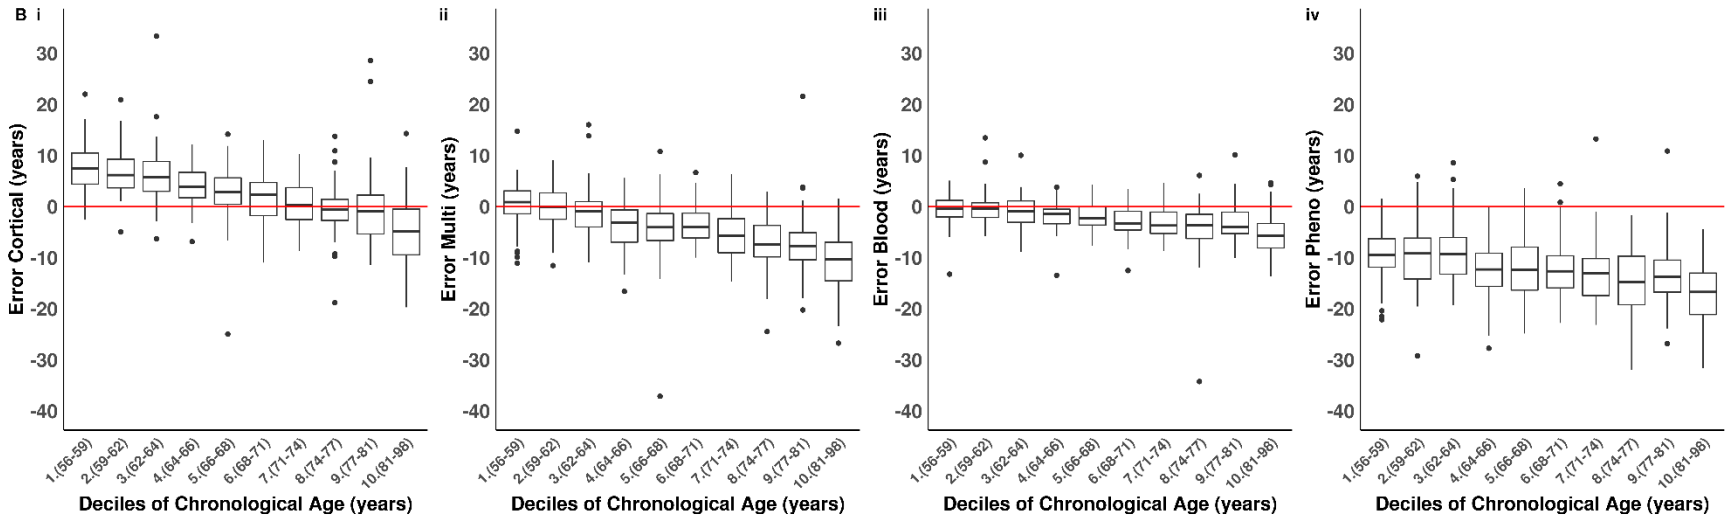

**Supplementary Table S1: Sample characteristics of the training (cortex), testing (cortex), independent test (cortex) and whole blood datasets used in the development and evaluation of our novel cortical DNA methylation clock including the number of samples from each brain region.**

| Dataset                      | Tissue Type | Brain regions (n)                                                                                                   | N    | Age (years) |        |          |       | Sex (n) |      | Illumina methylation array | Reference                                                                                                                           | GEO Accession number                              |
|------------------------------|-------------|---------------------------------------------------------------------------------------------------------------------|------|-------------|--------|----------|-------|---------|------|----------------------------|-------------------------------------------------------------------------------------------------------------------------------------|---------------------------------------------------|
|                              |             |                                                                                                                     |      | Mean        | Median | Range    | SD    | Female  | Male |                            |                                                                                                                                     |                                                   |
| <b>Training</b>              | Cortical    | <b>BA[9,11,17,25,41]</b> (284); <b>EC</b> (59); <b>HIP</b> (31); <b>PFC</b> (513); <b>STG</b> (83); <b>STR</b> (77) | 1047 | 56.53       | 57     | 1.34-108 | 24.13 | 362     | 685  | 450K                       | (Jaffe et al., 2016; De Jager et al., 2014; Lunnon et al., 2014; Pidsley et al., 2014; Smith et al., 2018, 2019; Wong et al., 2019) | GSE74193; GSE59685; GSE80970; GPL13534; GSE43414; |
| <b>Testing</b>               | Cortical    | <b>BA[9,11,17,25,41]</b> (97); <b>EC</b> (18); <b>HIP</b> (11); <b>PFC</b> (167); <b>STG</b> (37); <b>STR</b> (20)  | 350  | 55.87       | 56     | 1.34-108 | 24.25 | 144     | 206  | 450K                       | (Jaffe et al., 2016; De Jager et al., 2014; Lunnon et al., 2014; Pidsley et al., 2014; Smith et al., 2018, 2019; Wong et al., 2019) | GSE74193; GSE59685; GSE80970; GPL13534; GSE43414; |
| <b>BDR</b>                   | Cortical    | <b>PFC</b> (612) <b>OCC</b> (609)                                                                                   | 1221 | 83.49       | 84     | 41-104   | 9.10  | 577     | 644  | EPIC                       | -                                                                                                                                   |                                                   |
| <b>Understanding Society</b> | Whole Blood | -                                                                                                                   | 1175 | 57.96       | 59     | 28-98    | 14.97 | 686     | 489  | EPIC                       | Hannon et al. (2018)                                                                                                                |                                                   |

\* BA = Brodmann area; EC = Entorhinal cortex; HIP = Hippocampus; PFC = Prefrontal cortex; OCC = Occipital lobe; STG = Superior temporal gyrus; STR = Striatum; SD = Standard deviation; GEO = Gene Expression Omnibus

**Supplementary Table S2: Age statistics for cohorts included in the training (cortex) and testing (cortex) datasets used in the development and evaluation of our novel cortical DNA methylation clock including the number of samples from each cohort.**

| Cohort / Brain Bank     | N   | Age (years)  |        |       |              |             |       | Sex (n) |      |
|-------------------------|-----|--------------|--------|-------|--------------|-------------|-------|---------|------|
|                         |     | 1st quartile | Median | Mean  | 3rd quartile | Range       | SD    | Female  | Male |
| <b>Edinburgh</b>        | 45  | 37           | 42     | 43.22 | 51           | 18-69       | 13.45 | 7       | 38   |
| <b>Harvard</b>          | 54  | 16.25        | 26.5   | 28.39 | 39           | 2-60        | 15.79 | 11      | 43   |
| <b>Lieber Institute</b> | 566 | 28.42        | 45.14  | 42.45 | 55.42        | 1.34-96.98  | 18.6  | 197     | 369  |
| <b>LBB2</b>             | 27  | 67.5         | 80     | 78.56 | 88.5         | 58-99       | 11.32 | 14      | 13   |
| <b>Maudsley</b>         | 282 | 64           | 79     | 73.15 | 86           | 25-105      | 17.06 | 123     | 159  |
| <b>Montreal</b>         | 137 | 30           | 41     | 44.47 | 57           | 18-90       | 18.28 | 28      | 109  |
| <b>MS</b>               | 125 | 76           | 82     | 82.89 | 89           | 70-108      | 7.88  | 64      | 61   |
| <b>NICHD</b>            | 18  | 15           | 21.5   | 26.61 | 42.75        | 4-67        | 18.55 | 0       | 18   |
| <b>Oxford</b>           | 29  | 62           | 64     | 62.38 | 68           | 41-71       | 8.51  | 9       | 20   |
| <b>ROSMAP</b>           | 114 | 77.32        | 81.82  | 81.45 | 86.18        | 65.99-89.73 | 5.45  | 53      | 61   |

\* LBB2 = London Brain Bank 2; MS = Mount Sinai; NICHD = National Institute of Child Health and Human Development; ROSMAP = Religious Orders Study and Rush Memory and Aging Project; SD = Standard Deviation

**Supplementary Table S3: The Cortical Clock DNA methylation probes and their coefficients.**

Using elastic net regression we identified 347 DNA methylation sites which in combination optimally predict age in the human cortex. The sum of DNAm levels at these sites weighted by their regression coefficients provides the Cortical Clock DNA methylation age estimate. These coefficient values relate to a transformed version of age and therefore the linear combination of CpGs needs to be suitably transformed.

| <b>Illumina Probe ID</b> | <b>Coefficient</b> |
|--------------------------|--------------------|
| (Intercept)              | 0.57768257         |
| cg00059225               | 0.24595921         |
| cg00088042               | 0.18271556         |
| cg00252534               | 0.16822336         |
| cg00297950               | 0.14175773         |
| cg00384539               | 0.17820188         |
| cg00491255               | 0.14450779         |
| cg00521255               | -0.2443627         |
| cg00648582               | -0.0391462         |
| cg00771642               | 0.12772573         |
| cg00924265               | -0.0685163         |
| cg00935119               | -0.038119          |
| cg00940577               | -0.0612173         |
| cg01091514               | -0.0322298         |
| cg01122755               | 0.06571091         |
| cg01162920               | -0.1973567         |
| cg01194538               | -0.1516094         |
| cg01264729               | -0.1524237         |
| cg01311102               | -0.1092163         |
| cg01529637               | 0.02680964         |
| cg01532168               | 0.33465593         |
| cg01616394               | -0.0187101         |
| cg01639032               | 0.5150527          |
| cg01641432               | -0.0013768         |
| cg01655150               | -0.3276135         |
| cg01745370               | -0.0058643         |
| cg01899542               | -0.0509626         |
| cg02046143               | -0.0077791         |
| cg02047661               | -0.0171169         |
| cg02357838               | 0.23797342         |
| cg02361903               | -0.5452234         |
| cg02397497               | 0.07620684         |
| cg02448244               | 0.03955555         |
| cg02504211               | 0.13446075         |
| cg02524236               | -0.058474          |
| cg02546818               | 0.01616236         |
| cg02583546               | -0.0359673         |
| cg02795151               | -0.0056271         |
| cg02983424               | 0.05696411         |
| cg03001484               | -0.0258987         |
| cg03025830               | 0.13631721         |
| cg03040821               | -0.0574853         |
| cg03048488               | -0.1256683         |
| cg03591753               | -0.4520824         |
| cg03594801               | -0.0691302         |
| cg03613618               | -0.1393547         |

|            |            |
|------------|------------|
| cg03633073 | 0.24465057 |
| cg03639603 | 0.07133576 |
| cg03710354 | 0.00012886 |
| cg03717616 | -0.1918336 |
| cg03854598 | 0.19543214 |
| cg03864215 | -0.3501439 |
| cg04031134 | 0.02070123 |
| cg04036898 | -0.0001322 |
| cg04055913 | -0.0657139 |
| cg04060163 | -0.0111752 |
| cg04078896 | -0.0120007 |
| cg04235075 | 0.20720766 |
| cg04315771 | -0.052222  |
| cg04370442 | 0.07671797 |
| cg04432319 | 0.37983386 |
| cg04604946 | -0.1166149 |
| cg04684267 | 0.56103948 |
| cg04686264 | 0.09996322 |
| cg04704414 | -0.0249742 |
| cg04834794 | 0.86355274 |
| cg04880546 | 0.03041421 |
| cg04913265 | 0.05506598 |
| cg05006304 | -0.099641  |
| cg05030953 | -0.012153  |
| cg05149386 | -0.1053181 |
| cg05213896 | 0.01844346 |
| cg05280698 | 0.25970942 |
| cg05333146 | 0.19252122 |
| cg05362168 | -0.0134173 |
| cg05396044 | 0.9444237  |
| cg05404236 | 0.09491394 |
| cg05444541 | -0.0118706 |
| cg05634040 | -0.0761376 |
| cg05724492 | 0.03479139 |
| cg05756780 | 0.06888371 |
| cg05785488 | 0.58125152 |
| cg05795849 | -0.0377685 |
| cg05839636 | -0.0709078 |
| cg06069616 | -0.0128466 |
| cg06144905 | 0.05548133 |
| cg06236737 | -0.4656742 |
| cg06385324 | 0.08016557 |
| cg06570818 | -0.0040639 |
| cg06645033 | 0.23463392 |
| cg06648759 | 0.40674287 |
| cg06711656 | 0.15663601 |
| cg06751446 | 0.08353432 |
| cg06852461 | -0.0063935 |
| cg07011538 | -0.0337366 |
| cg07120479 | -0.4293158 |
| cg07181374 | -0.1310245 |
| cg07197480 | 0.04978597 |
| cg07461572 | -0.0014446 |
| cg07544187 | 0.19887884 |
| cg07547549 | 0.01343572 |

|            |            |
|------------|------------|
| cg07550554 | 0.2486126  |
| cg07581257 | -0.1444611 |
| cg07806886 | 0.01131    |
| cg08097417 | 0.55988863 |
| cg08193650 | 0.07922242 |
| cg08370996 | 0.124238   |
| cg08594681 | -0.0976416 |
| cg08606497 | -0.0136992 |
| cg08708711 | 0.03540909 |
| cg08727193 | 0.11187629 |
| cg08786136 | 0.13167062 |
| cg08952475 | -0.0018342 |
| cg08995871 | 0.0004663  |
| cg09058748 | 0.00609294 |
| cg09124496 | -0.0726601 |
| cg09178970 | -0.0244848 |
| cg09254686 | -0.2087676 |
| cg09363564 | -0.1487783 |
| cg09372546 | -0.018437  |
| cg09407967 | 0.07651973 |
| cg09468836 | 0.02747043 |
| cg09664474 | -0.711323  |
| cg09731141 | -0.002565  |
| cg09810078 | 0.03982331 |
| cg09888620 | 0.22004768 |
| cg09906752 | -0.015249  |
| cg09935271 | -0.0195523 |
| cg10027085 | -0.0038364 |
| cg10104252 | -0.0272235 |
| cg10225362 | 0.04192172 |
| cg10232140 | -0.0178474 |
| cg10359006 | -0.1063366 |
| cg10378521 | -0.2043615 |
| cg10389229 | 0.00641507 |
| cg10460946 | -0.2376023 |
| cg10501210 | -0.305486  |
| cg10574566 | -0.0829055 |
| cg10790698 | -0.1026348 |
| cg10851350 | -0.0098493 |
| cg10904972 | -0.0784357 |
| cg10924085 | -0.0343679 |
| cg10961323 | 0.0117429  |
| cg11018337 | 0.10227319 |
| cg11071401 | 0.00301298 |
| cg11120115 | -0.1945644 |
| cg11397957 | -0.1287726 |
| cg11462165 | 0.1817344  |
| cg11565355 | 0.11512885 |
| cg11603443 | 0.11675982 |
| cg11719412 | -0.0717141 |
| cg12024906 | 0.05166947 |
| cg12100751 | 0.08174288 |
| cg12175729 | 0.07132377 |
| cg12423733 | -0.0653703 |
| cg12591491 | 0.24421376 |

|            |            |
|------------|------------|
| cg12597389 | 0.5583175  |
| cg12637942 | 0.17055797 |
| cg12950231 | -0.0656435 |
| cg12978800 | -0.1818211 |
| cg13099374 | -0.0473964 |
| cg13259357 | 0.03688023 |
| cg13298199 | -0.0971264 |
| cg13308350 | -0.2068517 |
| cg13327545 | 0.17202187 |
| cg13477806 | 0.03348578 |
| cg13718185 | -0.0024661 |
| cg13733708 | -0.0027441 |
| cg13744194 | 0.09010979 |
| cg13755546 | 0.16217758 |
| cg13806267 | 0.02601212 |
| cg13848598 | 0.31150974 |
| cg14189141 | 0.14486526 |
| cg14242024 | -0.0891087 |
| cg14343652 | -0.4916114 |
| cg14489570 | -0.0668353 |
| cg14507337 | 0.04659403 |
| cg14577472 | 0.0484974  |
| cg14611683 | 0.05482077 |
| cg14655122 | 0.2417095  |
| cg14704921 | 0.21510624 |
| cg14759277 | 0.11132052 |
| cg14871932 | 0.10868066 |
| cg15001747 | 0.43298364 |
| cg15022387 | 0.04441422 |
| cg15341124 | 0.90243633 |
| cg15393490 | -0.8410718 |
| cg15410236 | 0.21389648 |
| cg15540623 | -0.2615207 |
| cg15593298 | 0.33773506 |
| cg15638207 | -0.6916681 |
| cg15665342 | -0.0605596 |
| cg15718663 | 0.11706067 |
| cg15925792 | -0.307196  |
| cg15927455 | -0.3584996 |
| cg15974867 | 0.02314957 |
| cg15988970 | -0.0064278 |
| cg16121765 | -0.0123589 |
| cg16142349 | -0.2568507 |
| cg16148593 | -0.0981528 |
| cg16206504 | -0.0083124 |
| cg16339238 | 0.00143445 |
| cg16340422 | -0.0292647 |
| cg16359034 | -0.0461923 |
| cg16408865 | -0.1234816 |
| cg16604975 | 0.01666265 |
| cg16643261 | -0.1185516 |
| cg16703882 | 0.09662046 |
| cg16865965 | -0.0417045 |
| cg16867657 | 0.19738643 |
| cg16909962 | 0.26618242 |

|            |            |
|------------|------------|
| cg17040471 | 0.01800027 |
| cg17086398 | -0.2146144 |
| cg17117277 | 0.41446544 |
| cg17341113 | 1.44006579 |
| cg17411994 | -0.0762994 |
| cg17435266 | 0.06161905 |
| cg17523253 | -0.0670554 |
| cg17592231 | 0.68799031 |
| cg17640485 | -0.3129539 |
| cg17693222 | 0.00318175 |
| cg18077971 | 0.0867302  |
| cg18125865 | 0.65840184 |
| cg18247055 | 0.01999414 |
| cg18279094 | 0.35656711 |
| cg18427787 | -0.0441448 |
| cg18449120 | 0.00500354 |
| cg18468088 | 0.22981384 |
| cg18480946 | 0.00979905 |
| cg18504218 | -0.008073  |
| cg18514820 | 0.22286731 |
| cg18540328 | 0.02261323 |
| cg18549036 | 0.00040885 |
| cg18584803 | -0.1976921 |
| cg18604199 | -0.0521892 |
| cg18626323 | -0.0303841 |
| cg19028706 | -0.0901704 |
| cg19056004 | -0.043383  |
| cg19142026 | 0.24687437 |
| cg19230755 | 0.00276837 |
| cg19242851 | -0.1708169 |
| cg19399220 | 0.23167516 |
| cg19416570 | 0.21729811 |
| cg19699893 | 0.13548726 |
| cg19724470 | -0.0496928 |
| cg19802138 | 0.01144858 |
| cg19807317 | -0.0546721 |
| cg19955173 | -0.0675901 |
| cg20185454 | 0.18559061 |
| cg20198242 | -0.0058134 |
| cg20429250 | 0.02217301 |
| cg20495179 | -0.3422078 |
| cg20516262 | -0.0036741 |
| cg20583430 | 0.04465635 |
| cg20594982 | 0.20060143 |
| cg20603637 | 0.04123459 |
| cg20627572 | -0.037941  |
| cg20697204 | 0.04133236 |
| cg20747577 | -0.0067257 |
| cg20773033 | -0.205063  |
| cg20818778 | 0.03589532 |
| cg21010435 | 0.00127567 |
| cg21052766 | -0.0232065 |
| cg21186299 | 0.05465318 |
| cg21218687 | 0.12544553 |
| cg21415530 | 0.00975912 |



|            |            |
|------------|------------|
| cg21581504 | 0.10314205 |
| cg21801378 | 0.3019194  |
| cg21826815 | 0.14908739 |
| cg21851534 | -0.0365721 |
| cg21865150 | -0.0024381 |
| cg21967909 | 0.13778356 |
| cg22007809 | -0.0919512 |
| cg22131013 | -0.0213741 |
| cg22285878 | 0.49092431 |
| cg22320999 | -0.0141227 |
| cg22344793 | 0.00901416 |
| cg22363327 | 0.0637605  |
| cg22531668 | 0.03617343 |
| cg22661556 | 0.10352047 |
| cg22714290 | -0.0507599 |
| cg22884541 | 0.14417822 |
| cg22900415 | 0.04351403 |
| cg23051272 | -0.0698149 |
| cg23091758 | 0.11685302 |
| cg23124451 | -0.3676633 |
| cg23163283 | -0.1166281 |
| cg23166770 | -0.4055405 |
| cg23174607 | 0.47022718 |
| cg23201812 | -0.0043506 |
| cg23352942 | -0.0709361 |
| cg23474190 | -0.0992123 |
| cg23606718 | 0.25215709 |
| cg23636833 | 0.05409979 |
| cg23661344 | -0.0953841 |
| cg23662138 | -0.1453696 |
| cg23684204 | 0.36656376 |
| cg23813012 | 0.09645841 |
| cg23896431 | 0.10834819 |
| cg23939875 | -0.0027469 |
| cg23995914 | 0.13059076 |
| cg24085039 | -0.0266476 |
| cg24231804 | -0.0610665 |
| cg24287218 | -0.057864  |
| cg24346776 | 0.03688965 |
| cg24377285 | -0.0034626 |
| cg24420164 | 0.01149875 |
| cg24483655 | -0.1180724 |
| cg24567591 | 0.00663023 |
| cg24715767 | 0.03440595 |
| cg24718465 | 0.09807228 |
| cg24933925 | -0.0626709 |
| cg24990808 | -0.0417352 |
| cg25007705 | -0.2476066 |
| cg25018458 | 0.51960078 |
| cg25090514 | 0.5000666  |
| cg25114611 | -0.1558847 |
| cg25201359 | -0.3919139 |
| cg25459323 | -0.0912804 |
| cg25922329 | -0.0449031 |
| cg26092675 | 0.09283213 |

|                |            |
|----------------|------------|
| cg26115633     | 0.27801401 |
| cg26161329     | 0.64983683 |
| cg26242531     | -0.3438033 |
| cg26306636     | 0.67247185 |
| cg26332630     | -0.0217055 |
| cg26377000     | 0.06837371 |
| cg26384036     | 0.08320489 |
| cg26472036     | -0.2159495 |
| cg26490949     | 0.39372896 |
| cg26542283     | 0.06460673 |
| cg26645401     | 0.23806474 |
| cg26660754     | -0.3879276 |
| cg26726230     | 0.08107185 |
| cg26782108     | 0.09393526 |
| cg26856080     | 0.25484991 |
| cg26885220     | 0.15739762 |
| cg26952697     | -0.0575663 |
| cg26952796     | -0.0916588 |
| cg27013696     | 0.18890756 |
| cg27043838     | 0.00732047 |
| cg27134767     | -0.1281932 |
| cg27230784     | 0.11078553 |
| cg27388680     | -0.1024366 |
| cg27414487     | -0.0433871 |
| cg27529628     | 0.01778693 |
| ch.2.1904845F  | -0.1201514 |
| ch.2.71774667F | -0.2699354 |

---

**Supplementary Table S4: Overlap between the probes which collectively make up the Cortical DNA methylation clock and three other DNA methylation age clocks: Horvath's Multi tissue DNA methylation Clock, Zhang's Blood DNA methylation Clock and Levine's Pheno Age DNA methylation Clock.**

| <b>Overlap Horvath Multi Tissue</b> | <b>Overlap Zhang Blood</b> | <b>Overlap Levine Pheno Age</b> |
|-------------------------------------|----------------------------|---------------------------------|
| cg06144905                          | cg02046143                 | cg06144905                      |
| cg08370996                          | cg03025830                 | cg19724470                      |
| cg19724470                          | cg04604946                 | cg21801378                      |
| cg21801378                          | cg04684267                 | cg23124451                      |
| cg23124451                          | cg06648759                 | cg25459323                      |
|                                     | cg07547549                 |                                 |
|                                     | cg08097417                 |                                 |
|                                     | cg09935271                 |                                 |
|                                     | cg15393490                 |                                 |
|                                     | cg16867657                 |                                 |
|                                     | cg18468088                 |                                 |
|                                     | cg21186299                 |                                 |
|                                     | cg23174607                 |                                 |
|                                     | cg23606718                 |                                 |
|                                     | cg23995914                 |                                 |

**Supplementary Table S5: The relationship between DNAm age and technical and biological variables.** DNAm age was estimated using our novel cortical clock in the independent test dataset (n=1,221). DNAm age was regressed against biological and technical variables (cell proportions, sex, post-mortem interval and batch).

|                         | <b>Beta</b> | <b>SE</b> | <b>P</b> |
|-------------------------|-------------|-----------|----------|
| <b>Cell proportions</b> | -8.72       | 0.67      | 9.57E-36 |
| <b>Sex</b>              | 0.60        | 0.28      | 0.03     |
| <b>PMI</b>              | -3.90E-03   | 0.01      | 0.54     |
| <b>Batch</b>            | -0.03       | 0.03      | 0.38     |

\*DNAm = DNA methylation; PMI = Post-mortem interval
